# Supplementary material for: Association of vaccine intention against COVID-19 using the 5C Scale and its constructs: a Pima County, Arizona cross-sectional survey
Source: PeerJ. 2024 Dec 6;12:e18316. doi: 10.7717/peerj.18316 (PMC11627084; doi:10.7717/peerj.18316)
Supplement: Supplemental Information 3 — This metadata describes the types of information in the dataset. [file peerj-12-18316-s003.xlsx]

## Sheet: Data Dictionary
Variable Name	Field Label	Choices, Calculations, OR Slider Labels
StartDate	Start Date
EndDate	End Date
Status	Response Type
IPAddress	IP Address
Progress	Progress
Duration (in seconds)	Duration (in seconds)
Finished	Finished
RecordedDate	Recorded Date
ResponseId	Response ID
RecipientLastName	Recipient Last Name
RecipientFirstName	Recipient First Name
RecipientEmail	Recipient Email
ExternalReference	External Data Reference
LocationLatitude	Location Latitude
LocationLongitude	Location Longitude
DistributionChannel	Distribution Channel
UserLanguage	User Language
Q_RecaptchaScore	Q_RecaptchaScore
consent	please choose one of the options below:	1, I agree to take part in this study | 2, I DO NOT agree to take part in this study
age	Age (years)
residence	Are you a resident of Pima County in Arizona?	1, Yes | 2, No
Q158	Do you belong to any of the following groups: African American, Hispanic/Latino, Asian, Native, Native Hawaiian, other Pacific Islander, American Indian, Alaska Native or Mixed Race?	1, Yes | 2, No
flushot	Have you ever received a flu shot?	1, Yes | 2, No
fs_away	I did not get the flu shot because the place to get the flu shot was too far away.	1, Strongly Agree | 2, Agree | 3, Neither Agree nor Disagree | 4, Disagree | 5, Strongly Disagree
fs_hours	I did not get the flu shot because the hours for the shot did not work with my schedule.	1, Strongly Agree | 2, Agree | 3, Neither Agree nor Disagree | 4, Disagree | 5, Strongly Disagree
fs_transport	I did not get the flu shot because I did not have transportation.	1, Strongly Agree | 2, Agree | 3, Neither Agree nor Disagree | 4, Disagree | 5, Strongly Disagree
fs_time	I did not get the flu shot because I did not have time.	1, Strongly Agree | 2, Agree | 3, Neither Agree nor Disagree | 4, Disagree | 5, Strongly Disagree
fs_location	I did not get the flu shot because I did not know where to go.	1, Strongly Agree | 2, Agree | 3, Neither Agree nor Disagree | 4, Disagree | 5, Strongly Disagree
fs_insurance	I did not get the flu shot because I did not have insurance.	1, Strongly Agree | 2, Agree | 3, Neither Agree nor Disagree | 4, Disagree | 5, Strongly Disagree
fs_money	I did not get the flu shot because I did not want to spend the money.	1, Strongly Agree | 2, Agree | 3, Neither Agree nor Disagree | 4, Disagree | 5, Strongly Disagree
fs_allergy	I did not get the flu shot because I cannot receive the flu shot because of an allergy or for other medical reasons.	1, Strongly Agree | 2, Agree | 3, Neither Agree nor Disagree | 4, Disagree | 5, Strongly Disagree
fs_religion	I did not get the flu shot because it is against my religion/spiritual beliefs.	1, Strongly Agree | 2, Agree | 3, Neither Agree nor Disagree | 4, Disagree | 5, Strongly Disagree
fs_needle	I did not get the flu shot because I have a fear of needles.	1, Strongly Agree | 2, Agree | 3, Neither Agree nor Disagree | 4, Disagree | 5, Strongly Disagree
fs_healthy	I did not get the flu shot because I'm healthy.	1, Strongly Agree | 2, Agree | 3, Neither Agree nor Disagree | 4, Disagree | 5, Strongly Disagree
fs_natural	I did not get the flu shot because I let my body handle the flu naturally.	1, Strongly Agree | 2, Agree | 3, Neither Agree nor Disagree | 4, Disagree | 5, Strongly Disagree
fs_traditional	I did not get the flu shot because I prefer home remedies/traditional medicine.	1, Strongly Agree | 2, Agree | 3, Neither Agree nor Disagree | 4, Disagree | 5, Strongly Disagree
fs_protect	I did not get the flu shot because I do not believe the flu shot will protect me from the flu.	1, Strongly Agree | 2, Agree | 3, Neither Agree nor Disagree | 4, Disagree | 5, Strongly Disagree
fs_govt	I did not get the flu shot because I do not trust flu shot recommendations from the government.	1, Strongly Agree | 2, Agree | 3, Neither Agree nor Disagree | 4, Disagree | 5, Strongly Disagree
fs_ingredients	I did not get the flu shot because I believe the flu shot contains dangerous ingredients.	1, Strongly Agree | 2, Agree | 3, Neither Agree nor Disagree | 4, Disagree | 5, Strongly Disagree
fs_risk	I did not get the flu shot because I believe flu shots put me at risk for getting the flu.	1, Strongly Agree | 2, Agree | 3, Neither Agree nor Disagree | 4, Disagree | 5, Strongly Disagree
fs_experience	I did not get the flu shot because I had a bad experience with a previous vaccination site/health clinic.	1, Strongly Agree | 2, Agree | 3, Neither Agree nor Disagree | 4, Disagree | 5, Strongly Disagree
fs_condition	I did not get the flu shot because I have a pre-existing condition.	1, Strongly Agree | 2, Agree | 3, Neither Agree nor Disagree | 4, Disagree | 5, Strongly Disagree
fs_other	Is there another reason you did not get the flu shot? Please explain below:
currentflu	Did you receive a flu shot during the 2020 flu season (starts in August 2020)?	1, Yes | 2, No
currentcvd	Did you receive the COVID-19 vaccine?	1, Yes, both doses | 2, Yes, first dose |3, No, I will wait and get it later | 4, No, I will not get it
nocvd_priority	I am not among one of the priority groups receiving vaccines at this time	6, Strongly Agree | 7, Agree | 8, Neither Agree nor Disagree | 9, Disagree | 10, Strongly Disagree
nocvd_register	I do not know where to register for a vaccine.	6, Strongly Agree | 7, Agree | 8, Neither Agree nor Disagree | 9, Disagree | 10, Strongly Disagree
nocvd_complicated	I am unable to register because the online form is too complicated.	6, Strongly Agree | 7, Agree | 8, Neither Agree nor Disagree | 9, Disagree | 10, Strongly Disagree
nocvd_transport	I do not have transportation to get vaccinated.	4, Strongly Agree | 5, Agree | 6, Neither Agree nor Disagree | 7, Disagree | 8, Strongly Disagree
nocvd_other	Is there another reason you did not get the COVID-19 vaccine? Please explain below:
int_flu	How likely is it that you will get a flu shot in the future?	1, Extremely likely | 2, Likely | 3, Neither likely nor unlikely | 4, Unlikely | 5, Extremely unlikely
int_fluprovider	How likely is it that you will get a flu shot if your healthcare provider strongly recommends it?	1, Extremely likely | 2, Likely | 3, Neither likely nor unlikely | 4, Unlikely | 5, Extremely unlikely
int_flurequired	I would get vaccinated against the flu if it were required for my work/school/travel.	1, Extremely likely | 2, Likely | 3, Neither likely nor unlikely | 4, Unlikely | 5, Extremely unlikely
int_cvd	How likely is it that you will get a COVID-19 vaccine (again) in the future?	1, Extremely likely | 2, Likely | 3, Neither likely nor unlikely | 4, Unlikely | 5, Extremely unlikely
int_cvdprovider	How likely is it that you will get a COVID-19 vaccine (again) if your healthcare provider strongly recommends it?	1, Extremely likely | 2, Likely | 3, Neither likely nor unlikely | 4, Unlikely | 5, Extremely unlikely
int_cvdrequired	I would get vaccinated against COVID-19 if it were required for my work/school/travel.	1, Extremely likely | 2, Likely | 3, Neither likely nor unlikely | 4, Unlikely | 5, Extremely unlikely
int_cvdwait	I plan to wait and see what happens to others before I get the COVID-19 vaccine.	1, Strongly Agree | 2, Agree | 3, Neither Agree nor Disagree | 4, Disagree | 5, Strongly Disagree
int_cvdprotect	I need to get the COVID-19 vaccine to protect myself against new COVID-19 strains that may be more contagious or more deadly.	1, Strongly Agree | 2, Agree | 3, Neither Agree nor Disagree | 4, Disagree | 5, Strongly Disagree
int_cvdprevious	I need to get a COVID-19 vaccination even if I have previously had the COVID-19 disease.	1, Strongly Agree | 2, Agree | 3, Neither Agree nor Disagree | 4, Disagree | 5, Strongly Disagree
int_cvddecline	If COVID-19 infections decline I won't need a COVID-19 vaccination.	1, Strongly Agree | 2, Agree | 3, Neither Agree nor Disagree | 4, Disagree | 5, Strongly Disagree
Q157	Please select Agree to prove that you are paying attention.	1, Strongly Agree | 4, Agree | 2, Neither Agree nor Disagree | 5, Disagree | 6, Strongly Disagree
flu_worry	I donâ€™t really worry about getting infected with the flu.	1, Strongly Agree | 2, Agree | 3, Neither Agree nor Disagree | 4, Disagree | 5, Strongly Disagree
flu_die	I am afraid that I may die if I get the flu.	1, Strongly Agree | 2, Agree | 3, Neither Agree nor Disagree | 4, Disagree | 5, Strongly Disagree
flu_pass	If I test positive for the flu, I could pass it to my family and friends.	1, Strongly Agree | 2, Agree | 3, Neither Agree nor Disagree | 4, Disagree | 5, Strongly Disagree
flu_health	I am at greater risk of dying than other people if I contract the flu because of my health.	1, Strongly Agree | 2, Agree | 3, Neither Agree nor Disagree | 4, Disagree | 5, Strongly Disagree
flu_finance	I am worried about financial stresses for me or my family if I get sick with the flu.	1, Strongly Agree | 2, Agree | 3, Neither Agree nor Disagree | 4, Disagree | 5, Strongly Disagree
flu_alone	I am afraid of being alone or isolated from others if I get sick with the flu.	1, Strongly Agree | 2, Agree | 3, Neither Agree nor Disagree | 4, Disagree | 5, Strongly Disagree
flu_hospital	I am afraid of being hospitalized if I get sick with the flu.	1, Strongly Agree | 2, Agree | 3, Neither Agree nor Disagree | 4, Disagree | 5, Strongly Disagree
flu_faith	It is not in my hands, but Godâ€™s hands, if I die from the flu.	1, Strongly Agree | 2, Agree | 3, Neither Agree nor Disagree | 4, Disagree | 5, Strongly Disagree
cvd_worry	I donâ€™t really worry about getting infected with the virus that causes COVID-19.	1, Strongly Agree | 2, Agree | 3, Neither Agree nor Disagree | 4, Disagree | 5, Strongly Disagree
cvd_die	I am afraid that I may die if I contract COVID-19.	1, Strongly Agree | 2, Agree | 3, Neither Agree nor Disagree | 4, Disagree | 5, Strongly Disagree
cvd_pass	If I test positive for COVID-19, I could pass it to my family and friends.	1, Strongly Agree | 2, Agree | 3, Neither Agree nor Disagree | 4, Disagree | 5, Strongly Disagree
cvd_health	I am at greater risk of dying than other people if I contract COVID-19 because of my general health.	1, Strongly Agree | 2, Agree | 3, Neither Agree nor Disagree | 4, Disagree | 5, Strongly Disagree
cvd_finance	I am worried about financial stresses for me or my family if I get sick with COVID-19.	1, Strongly Agree | 2, Agree | 3, Neither Agree nor Disagree | 4, Disagree | 5, Strongly Disagree
cvd_alone	I am afraid of being alone or isolated from others if I get sick with COVID-19.	1, Strongly Agree | 2, Agree | 3, Neither Agree nor Disagree | 4, Disagree | 5, Strongly Disagree
cvd_hospital	I am afraid of being hospitalized if I get sick with COVID-19.	1, Strongly Agree | 2, Agree | 3, Neither Agree nor Disagree | 4, Disagree | 5, Strongly Disagree
cvd_faith	It is not in my hands, but God's hands, if I die from COVID-19.	1, Strongly Agree | 2, Agree | 3, Neither Agree nor Disagree | 4, Disagree | 5, Strongly Disagree
cvd_subject	I am worried about being a test subject for vaccination against COVID-19.	1, Strongly Agree | 2, Agree | 3, Neither Agree nor Disagree | 4, Disagree | 5, Strongly Disagree
cvd_access	I cannot get access to COVID-19 vaccinations.	1, Strongly Agree | 2, Agree | 3, Neither Agree nor Disagree | 4, Disagree | 5, Strongly Disagree
cvd_register	I have trouble with the COVID-19 vaccination registration process.	1, Strongly Agree | 2, Agree | 3, Neither Agree nor Disagree | 4, Disagree | 5, Strongly Disagree
fluinfection	How likely do you believe it is that you will get infected with the virus that causes the flu?	1, Extremely likely | 2, Likely | 3, Neither likely nor unlikely | 4, Unlikely | 5, Extremely unlikely
cvdinfection	How likely do you believe it is that you will get infected with the virus that causes COVID-19?	1, Extremely likely | 2, Likely | 3, Neither likely nor unlikely | 4, Unlikely | 5, Extremely unlikely
fluthreat	How threatening would it be to your health if you got infected with the virus that causes the flu?	1, Extremely threatening | 2, Threatening | 3, Neither threatening nor unthreatening | 4, Unthreatening | 5, Extremely unthreatening
cvdthreat	How threatening would it be to your health if you got infected with the virus that causes COVID-19?	1, Extremely threatening | 2, Threatening | 3, Neither threatening nor unthreatening | 4, Unthreatening | 5, Extremely unthreatening
trust_1	Would you trust advice from any of the following people or organizations about getting the Flu shot or the COVID-19 vaccine? - A celebrity	1, Yes | 2, No
trust_2	Would you trust advice from any of the following people or organizations about getting the Flu shot or the COVID-19 vaccine? - Dr Anthony (Tony) Fauci	1, Yes | 2, No
trust_3	Would you trust advice from any of the following people or organizations about getting the Flu shot or the COVID-19 vaccine? - A political leader	1, Yes | 2, No
trust_4	Would you trust advice from any of the following people or organizations about getting the Flu shot or the COVID-19 vaccine? - A doctor or healthcare professional (other than Dr. Fauci)	1, Yes | 2, No
trust_5	Would you trust advice from any of the following people or organizations about getting the Flu shot or the COVID-19 vaccine? - Community Health Workers or Promotoras	1, Yes | 2, No
trust_6	Would you trust advice from any of the following people or organizations about getting the Flu shot or the COVID-19 vaccine? - A co-worker or employer	1, Yes | 2, No
trust_7	Would you trust advice from any of the following people or organizations about getting the Flu shot or the COVID-19 vaccine? - A religious/spiritual/community leader	1, Yes | 2, No
trust_8	Would you trust advice from any of the following people or organizations about getting the Flu shot or the COVID-19 vaccine? - A friend or family member	1, Yes | 2, No
trust_9	Would you trust advice from any of the following people or organizations about getting the Flu shot or the COVID-19 vaccine? - Posted information in the community, such a posters or brochures	1, Yes | 2, No
trust_10	Would you trust advice from any of the following people or organizations about getting the Flu shot or the COVID-19 vaccine? - Social media (Facebook, Twitter, etc.)	1, Yes | 2, No
trust_11	Would you trust advice from any of the following people or organizations about getting the Flu shot or the COVID-19 vaccine? - Internet search (Google, Safari, Internet Explorer, etc)	1, Yes | 2, No
trust_12	Would you trust advice from any of the following people or organizations about getting the Flu shot or the COVID-19 vaccine? - The news	1, Yes | 2, No
trust_13	Would you trust advice from any of the following people or organizations about getting the Flu shot or the COVID-19 vaccine? - Specific national health organization websites (such as the CDC, National Institutes for Health, Medline Plus)	1, Yes | 2, No
trust_14	Would you trust advice from any of the following people or organizations about getting the Flu shot or the COVID-19 vaccine? - Online community forums or blogs	1, Yes | 2, No
trust_15	Would you trust advice from any of the following people or organizations about getting the Flu shot or the COVID-19 vaccine? - The Health Department	1, Yes | 2, No
trust_16	Would you trust advice from any of the following people or organizations about getting the Flu shot or the COVID-19 vaccine? - The Library	1, Yes | 2, No
trust_17	Would you trust advice from any of the following people or organizations about getting the Flu shot or the COVID-19 vaccine? - Health Fairs	1, Yes | 2, No
trust_18	Would you trust advice from any of the following people or organizations about getting the Flu shot or the COVID-19 vaccine? - Any information source as long as it is consistent	1, Yes | 2, No
trust_19	Would you trust advice from any of the following people or organizations about getting the Flu shot or the COVID-19 vaccine? - Other	1, Yes | 2, No
trustother	If you indicated other, please name the specific well-known person, a person with a specific role/function (e.g. School Nurse) or an organization:
attitudeflu1	I am completely confident that flu shots are safe.	1, Strongly Agree | 2, Agree | 3, Neither Agree nor Disagree | 4, Disagree | 5, Strongly Disagree
attitudeflu2	Vaccination is unnecessary because flu is not common anymore.	1, Strongly Agree | 2, Agree | 3, Neither Agree nor Disagree | 4, Disagree | 5, Strongly Disagree
attitudeflu3	Everyday stress prevents me from getting vaccinated against the flu.	1, Strongly Agree | 2, Agree | 3, Neither Agree nor Disagree | 4, Disagree | 5, Strongly Disagree
attitudeflu4	When I think about getting vaccinated for the flu, I weigh benefits and risks to make the best decision possible.	1, Strongly Agree | 2, Agree | 3, Neither Agree nor Disagree | 4, Disagree | 5, Strongly Disagree
attitudeflu5	When everyone is vaccinated for the flu, I donâ€™t have to get vaccinated, too.	1, Strongly Agree | 2, Agree | 3, Neither Agree nor Disagree | 4, Disagree | 5, Strongly Disagree
attitudecvd1	I am completely confident that COVID-19 vaccines are safe.	1, Strongly Agree | 2, Agree | 3, Neither Agree nor Disagree | 4, Disagree | 5, Strongly Disagree
attitudecvd2	Vaccination is not necessary because COVID-19 is not common anymore.	1, Strongly Agree | 2, Agree | 3, Neither Agree nor Disagree | 4, Disagree | 5, Strongly Disagree
attitudecvd3	Everyday stress prevents me from getting vaccinated against COVID-19.	1, Strongly Agree | 2, Agree | 3, Neither Agree nor Disagree | 4, Disagree | 5, Strongly Disagree
attitudecvd4	When I think about getting vaccinated for COVID-19, I weigh benefits and risks to make the best decision possible.	1, Strongly Agree | 2, Agree | 3, Neither Agree nor Disagree | 4, Disagree | 5, Strongly Disagree
attitudecvd5	When everyone is vaccinated for COVID-19, I donâ€™t have to get vaccinated, too.	1, Strongly Agree | 2, Agree | 3, Neither Agree nor Disagree | 4, Disagree | 5, Strongly Disagree
gender	Gender	1, Male | 2, Female | 3, Nonbinary/third gender | 4, Prefer not to say | 5, Other
hispanic	Are you Hispanic or Latino?	1, Yes | 2, No | 3, Don't Know/Not Sure | 4, Prefer not to say
race	What is your race? Do you consider yourself... (Select one or more.)	1, White | 2, Black / African American | 3, Asian | 4, Native Hawaiian, other Pacific Islander, American Indian or Alaska Native | 5, Other | 6, Prefer not to say
maritalstatus	Marital Status	1, Married | 2, Divorced | 3, Widowed | 4, Separated | 5, Never married | 6, Member of unmarried couple | 7, Prefer not to say
school	What is the highest grade or year of school you have completed?	1, Never attended school or only attended kindergarten | 2, Grades 1 through 8 - elementary | 3, Grades 9 through 11 - some high school | 4, Grade 12 or GED - high school graduate | 5, College 1 year to 3 years - some college or technical school | 6, College 4 years or more - college graduate | 7, Prefer not to say
income	Please select your income range	1, Less than $10,000 | 2, $10,000 to less than $15,000 | 3, $15,000 to less than $20,000 | 4, $20,000 to less than $25,000 | 5, $25,000 to less than $35,000 | 6, $35,000 to less than $50,000 | 7, $50,000 to less than $75,000 | 8, $75,000 or more | 9, Prefer not to say
politics	What is your political affiliation?	1, Liberal | 2, Moderate | 3, Conservative | 4, Prefer not to say
Q148	Have you been a client of Casa Alitas in Tucson in the last 3 months?	21, Yes | 22, No
NEW VARIABLES (08.06.2022)
intend	How likely is it that you will get a COVID-19 vaccine (again) in the future?	1, Extremely likely and Likely | 2, Neither likely nor unlikely | 3, Unlikely or Extremely unlikely
int_cvd1	How likely is it that you will get a COVID-19 vaccine (again) in the future?	0, Neither likely nor unlikely, Unlikely or Extrememly unlikely | 1, Extremely likely and Likely
int_cvd_final	How likely is it that you will get a COVID-19 vaccine (again) in the future? (string)	1, Extremely unlikely | 2, Unikely | 3, Neither likely nor unlikely | 4, Likely | 5, Extremely likely
int_cvd_n	How likely is it that you will get a COVID-19 vaccine (again) in the future? (numeric)	1, Extremely unlikely | 2, Unikely | 3, Neither likely nor unlikely | 4, Likely | 5, Extremely likely
gender1	Gender	1, Male | 2, Female | 3, Nonbinary/third gender, Prefer not to say, Other
race2	Race	Numbers instead of categories: 1, White | 2, Black / African American | 3, Asian | 4, Native Hawaiian, other Pacific Islander, American Indian or Alaska Native | 5, Other | ., Prefer not to say and missing
race1	What is your race? Do you consider yourself... (Select one or more.)	1, White | 2, Anything else | ., Prefer not to say and missing
racefinal	What is your race? Do you consider yourself... (Select one or more.)	Numbers instead of categories: 1, White | 2, Black / African American | 3, Asian | 4, Native Hawaiian, other Pacific Islander, American Indian or Alaska Native | 5, Other |7, Mixed race, | 99, Prefer not to say
covidvaccine	Did you receive the COVID-19 vaccine? (numeric)	1, Yes, both doses | 2, Yes, first dose |3, No, I will wait and get it later | 4, No, I will not get it
collegegrad (previously school1)	School	0 , below college graduate | 1, College Graduate | 99, prefer not to say
politics1	What is your political affiliation? (numeric)	1, Liberal | 2, Moderate | 3, Conservative | 4, Prefer not to say
politics_conservative	What is your political affiliation? (string)	1, Liberal | 2, Moderate | 3, Conservative | 4, Prefer not to say
conservative	What is your political affiliation? (numeric)	1, Liberal | 2, Moderate | 3, Conservative | 4, Prefer not to say
hispanic1	Are you Hispanic or Latino? (numeric)	1, Yes | 2, No | 99, Don't Know/Not Sure, Prefer not to say
marital	Marital Status (numeric)	0, Single | 1, Married, Member of unmarried couple | 2, Divorced, Widowed, Separated, Never married | 99, Prefer not to say
Conf_cvd	I am completely confident that COVID-19 vaccines are safe. (numeric)	1, Strongly disagree | 2, Disagree | 3, Neither Agree nor Disagree | 4, Agree | 5, Strongly agree
Compl_cvd	Vaccination is not necessary because COVID-19 is not common anymore. (numeric)	1, Strongly disagree | 2, Disagree | 3, Neither Agree nor Disagree | 4, Agree | 5, Strongly agree
Const_cvd	Everyday stress prevents me from getting vaccinated against COVID-19. (numeric)	1, Strongly disagree | 2, Disagree | 3, Neither Agree nor Disagree | 4, Agree | 5, Strongly agree
Calc_cvd	When I think about getting vaccinated for COVID-19, I weigh benefits and risks to make the best decision possible.(numeric)	1, Strongly disagree | 2, Disagree | 3, Neither Agree nor Disagree | 4, Agree | 5, Strongly agree
CollR_cvd	When everyone is vaccinated for COVID-19, I donâ€™t have to get vaccinated, too. (numeric)	1, Strongly Agree | 2, Agree | 3, Neither Agree nor Disagree | 4, Disagree | 5, Strongly Disagree
agecat	Age	1, 18-19 | 2, 20-39 | 3, 40-59 | 4 60+
income_n	Income	1, Less than $10,000 | 2, $10,000 to less than $15,000 | 3, $15,000 to less than $20,000 | 4, $20,000 to less than $25,000 | 5, $25,000 to less than $35,000 | 6, $35,000 to less than $50,000 | 7, $50,000 to less than $75,000 | 8, $75,000 or more | 99, Prefer not to say
fishy3emailagree5m1	Namoonga and Maiya agreed that observation was fishy, time to take survey was less than 5 min	LEGIT FISHY | ok
benjamindisputeresolution1	Benjamin's assessment of if the disputed observation was fishy	0, fishy | 0 but not AZ, not fishy but not in arizona
ben	Benjamin's assessment of if the disputed observation was fishy (numeric)	0, okay | 1, fishy | 2, 0 but not AZ

## Sheet: Questions
Proposed Variable name	Current name	survey question
[default in qualtrics]	ResponseId	Response ID
[default in qualtrics]	UserLanguage	User Language
concent	Q1	The following survey is being conducted in a collaboration between the University of Arizona Mel and Enid Zuckerman College of Public Health and the Pima County Health Department to better understand how people make decisions about whether to receive a vaccination to prevent COVID-19 and flu. The survey is completely anonymous and takes about 15 minutes to complete. On completion of the survey yo…
age	Q2	Age (years)
residence	Q4	Are you a resident of Pima County in Arizona?
flushot	Q99	Have you ever received a flu shot?
fs_away	Q79	I did not get the flu shot because the place to get the flu shot was too far away.
fs_hours	Q80	I did not get the flu shot because the hours for the shot did not work with my schedule.
fs_transport	Q81	I did not get the flu shot because I did not have transportation.
fs_time	Q82	I did not get the flu shot because I did not have time.
fs_location	Q83	I did not get the flu shot because I did not know where to go.
fs_insurance	Q84	I did not get the flu shot because I did not have insurance.
fs_money	Q85	I did not get the flu shot because I did not want to spend the money.
fs_allergy	Q86	I did not get the flu shot because I cannot receive the flu shot because of an allergy or for other medical reasons.
fs_religion	Q87	I did not get the flu shot because it is against my religion/spiritual beliefs.
fs_needle	Q88	I did not get the flu shot because I have a fear of needles.
fs_healthy	Q89	I did not get the flu shot because I'm healthy.
fs_natural	Q90	I did not get the flu shot because I let my body handle the flu naturally.
fs_traditional	Q91	I did not get the flu shot because I prefer home remedies/traditional medicine.
fs_protect	Q92	I did not get the flu shot because I do not believe the flu shot will protect me from the flu.
fs_government	Q93	I did not get the flu shot because I do not trust flu shot recommendations from the government.
fs_ingredients	Q94	I did not get the flu shot because I believe the flu shot contains dangerous ingredients.
fs_risk	Q95	I did not get the flu shot because I believe flu shots put me at risk for getting the flu.
fs_experience	Q96	I did not get the flu shot because I had a bad experience with a previous vaccination site/health clinic.
fs_condition	Q97	I did not get the flu shot because I have a pre-existing condition.
fs_other	Q98	Is there another reason you did not get the flu shot? Please explain below:
currentflu	Q10	Did you receive a flu shot during the 2020 flu season?
currentcovid	Q12	Did you receive the COVID-19 vaccine?
int_flu	Q102	How likely is it that you will get a flu shot in the future?
int_fluprovider	Q103	How likely is it that you will get a flu shot if your healthcare provider strongly recommends it?
int_flurequired	Q104	I would get vaccinated against the flu if it were required for my work/school/travel.
int_cvd	Q107	How likely is it that you will get a COVID-19 vaccine in the future?
int_cvdprovider	Q108	How likely is it that you will get a COVID-19 vaccine if your healthcare provider strongly recommends it?
int_cvdrequired	Q109	I would get vaccinated against COVID-19 if it were required for my work/school/travel.
int_cvdwait	Q110	I plan to wait and see what happens to others before I get the COVID-19 shot.
int_cvdprotect	Q111	I need to get the COVID-19 vaccine to protect myself against new COVID-19 strains that may be more contagious or more deadly.
int_cvdprevious	Q112	I need to get a COVID-19 vaccination even if I have previously had COVID-19 disease.
int_cvddecline	Q113	If COVID-19 infections decline I won’t need a COVID-19 vaccination.
flu_worry	Q120	I don’t really worry about getting infected with the flu.
flu_die	Q121	I am afraid that I may die if I contract the flu.
flu_pass	Q122	If I test positive for the flu, I could pass it to my family and friends.
flu_health	Q123	I am at greater risk of dying than other people if I contract the flu because of my general health.
flu_finance	Q124	I am worried about financial stresses for me or my family if I get sick with the flu.
flu_alone	Q125	I am afraid of being alone or isolated from others if I get sick with the flu.
flu_hospital	Q126	I am afraid of being hospitalized if I get sick with the flu.
flu_faith	Q127	It is not in my hands, but God’s hands, if I die from the flu.
cvd_worry	Q130	I don’t really worry about getting infected with the virus that causes COVID-19.
cvd_die	Q129	I am afraid that I may die if I contract COVID-19.
cvd_pass	Q132	If I test positive for COVID-19, I could pass it to my family and friends.
cvd_health	Q131	I am at greater risk of dying than other people if I contract COVID-19 because of my general health.
cvd_finance	Q134	I am worried about financial stresses for me or my family if I get sick with COVID-19.
cvd_alone	Q133	I am afraid of being alone or isolated from others if I get sick with COVID-19.
cvd_hospital	Q136	I am afraid of being hospitalized if I get sick with COVID-19.
cvd_faith	Q135	It is not in my hands, but God’s hands, if I die from COVID-19.
cvd_subject	Q137	I am worried about being a test subject for vaccination against COVID-19.
cvd_access	Q138	I cannot get access to COVID-19 vaccinations.
cvd_register	Q139	I have trouble with the COVID-19 vaccination registration process.
fluinfection	Q114	How likely do you believe it is that you will get infected with the virus that causes the flu?
cvdinfection	Q115	How likely do you believe it is that you will get infected with the virus that causes COVID-19?
fluthreat	Q117	How threatening would it be to your health if you got infected with the virus that causes the flu?
cvdthreat	Q116	How threatening would it be to your health if you got infected with the virus that causes COVID-19?
trust01	Q22_1	Would you trust advice from any of the following people or organizations about getting the Flu or the COVID-19 shot? - A celebrity
trust02	Q22_2	Would you trust advice from any of the following people or organizations about getting the Flu or the COVID-19 shot? - Dr Anthony (Tony) Fauci
trust03	Q22_3	Would you trust advice from any of the following people or organizations about getting the Flu or the COVID-19 shot? - A political leader
trust04	Q22_4	Would you trust advice from any of the following people or organizations about getting the Flu or the COVID-19 shot? - A doctor or healthcare professional (other than Dr. Fauci)
trust05	Q22_5	Would you trust advice from any of the following people or organizations about getting the Flu or the COVID-19 shot? - Community Health Workers or Promotoras
trust06	Q22_6	Would you trust advice from any of the following people or organizations about getting the Flu or the COVID-19 shot? - A co-worker or employer
trust07	Q22_7	Would you trust advice from any of the following people or organizations about getting the Flu or the COVID-19 shot? - A religious/spiritual/community leader
trust08	Q22_8	Would you trust advice from any of the following people or organizations about getting the Flu or the COVID-19 shot? - A friend or family member
trust09	Q22_9	Would you trust advice from any of the following people or organizations about getting the Flu or the COVID-19 shot? - Posted information in the community, such a posters or brochures
trust10	Q22_10	Would you trust advice from any of the following people or organizations about getting the Flu or the COVID-19 shot? - Social media (Facebook, Twitter, etc.)
trust11	Q22_11	Would you trust advice from any of the following people or organizations about getting the Flu or the COVID-19 shot? - Internet search (Google, Safari, Internet Explorer, etc)
trust12	Q22_12	Would you trust advice from any of the following people or organizations about getting the Flu or the COVID-19 shot? - The news
trust13	Q22_13	Would you trust advice from any of the following people or organizations about getting the Flu or the COVID-19 shot? - Specific national health organization websites (such as the CDC, National Institutes for Health, Medline Plus)
trust14	Q22_14	Would you trust advice from any of the following people or organizations about getting the Flu or the COVID-19 shot? - Online community forums or blogs
trust15	Q22_15	Would you trust advice from any of the following people or organizations about getting the Flu or the COVID-19 shot? - The Health Department
trust16	Q22_16	Would you trust advice from any of the following people or organizations about getting the Flu or the COVID-19 shot? - The Library
trust17	Q22_17	Would you trust advice from any of the following people or organizations about getting the Flu or the COVID-19 shot? - Health Fairs
trust18	Q22_18	Would you trust advice from any of the following people or organizations about getting the Flu or the COVID-19 shot? - Any information source as long as it is consistent
trust19	Q22_19	Would you trust advice from any of the following people or organizations about getting the Flu or the COVID-19 shot? - Other
trustother	Q23	If you indicated other, please name the specific well-known person, a person with a specific role/function (e.g. School Nurse) or an organization:
attitudeflu1	Q141	I am completely confident that flu shots are safe.
attitudeflu2	Q142	Vaccination is unnecessary because flu is not common anymore.
attitudeflu3	Q143	Everyday stress prevents me from getting vaccinated against the flu.
attitudeflu4	Q144	When I think about getting vaccinated for the flu, I weigh benefits and risks to make the best decision possible.
attitudeflu5	Q145	When everyone is vaccinated for the flu, I don’t have to get vaccinated, too.
attitudecvd1	Q147	I am completely confident that COVID-19 shots are safe.
attitudecvd2	Q151	Vaccination is not necessary because COVID-19 is not common anymore.
attitudecvd3	Q150	Everyday stress prevents me from getting vaccinated against COVID-19.
attitudecvd4	Q149	When I think about getting vaccinated for COVID-19, I weigh benefits and risks to make the best decision possible.
attitudecvd5	Q148	When everyone is vaccinated for COVID-19, I don’t have to get vaccinated, too.
gender	Q26	Gender
hispanic	Q27	Are you Hispanic or Latino?
race	Q28	What is your race? Do you consider yourself... (Select one or more.)
maritialstatus	Q29	Marital Status
school	Q30	What is the highest grade or year of school you have completed?
income	Q31	Please select your income range
politics	Q32	What is your political affiliation?
	Q34	Name
	Q35	Phone and/or email address:
	Q36	Venmo/Zelle/Paypal information:
	Q37	Would you consent to us storing your contact information for the duration of our study to let you know about future phases of the study?

## Sheet: Weighting
	Total population	"Design Weights"		Total population	"Design Weights"			Variable (Female only)	Variable (Male only)
	Hispanic	0.385		White	0.843
	Non-Hispanic	0.615		Black/African American	0.044
				Native Hawaiian, other Pacific Islander; American Indian and Alaska Native	0.047
	Desired #s			Asian	0.033
	Hispanic	241.01		Mixed race ; Other	0.035
	Non-Hispanic	172.815
	Actual #s			Desired #s
	Hispanic	626	0.690187	White	778.932
	Non-Hispanic	281	0.309813	Black/African American	40.656
		907		Native Hawaiian, other Pacific Islander; American Indian and Alaska Native	43.428
	Weighting Factors			Asian	30.492
	Hispanic	0.385		Mixed race ; Other	32.34
	Non-Hispanic	0.615
					925.848
				Actual #s
				White	654
				Black/African American	41
				Native Hawaiian, other Pacific Islander; American Indian and Alaska Native	23
				Asian	52
				Mixed race ; Other	154
					924
			code for racefinal	Weighting Factors
			1	White	1.19103
			2	Black/African American	0.99161
			4	Native Hawaiian, other Pacific Islander; American Indian and Alaska Native	1.88817
			3	Asian	0.586385
			5, 7	Mixed race ; Other	0.21
