# Supplementary material for: Association of vaccine intention against COVID-19 using the 5C Scale and its constructs: a Pima County, Arizona cross-sectional survey
Source: PeerJ. 2024 Dec 6;12:e18316. doi: 10.7717/peerj.18316 (PMC11627084; doi:10.7717/peerj.18316)
Supplement: Supplemental Information 5 [file peerj-12-18316-s005.docx]

**Appendix A:** Questions from questionnaire in 5C Scale Study

| **Item** | **Options** | **Type** |
| --- | --- | --- |
| **Confidence** I am completely confident that COVID-19 vaccines are safe. | 1, Strongly Disagree | 2, Disagree | 3, Neither Agree nor Disagree | 4, Agree | 5, Strongly Agree | Categorical |
| **Complacency** Vaccination is not necessary because COVID-19 is not common anymore. | 1, Strongly Disagree | 2, Disagree | 3, Neither Agree nor Disagree | 4, Agree | 5, Strongly Agree | Categorical |
| **Constraints** Everyday stress prevents me from getting vaccinated against COVID-19. | 1, Strongly Disagree | 2, Disagree | 3, Neither Agree nor Disagree | 4, Agree | 5, Strongly Agree | Categorical |
| **Calculation** When I think about getting vaccinated for COVID-19, I weigh benefits and risks to make the best decision possible. | 1, Strongly Disagree | 2, Disagree | 3, Neither Agree nor Disagree | 4, Agree | 5, Strongly Agree | Categorical |
| **Collective responsibility** When everyone is vaccinated for COVID-19, I don’t have to get vaccinated, too. | 1, Strongly Agree | 2, Agree | 3, Neither Agree nor Disagree | 4, Disagree | 5, Strongly Disagree | Categorical |
| **Gender** | 1, Male | 2, Female | 3, Nonbinary/third gender, Prefer not to say, Other | Categorical |
| **Age** | Continuous variable, | Categorical |
| **Ethnicity** Are you Hispanic or Latino? | 1, Yes | 2, No | 99, Don't Know/Not Sure, Prefer not to say | Categorical |
| **Race** What is your race? Do you consider yourself... (Select one or more.) | 1, White | 2, Black / African American | 3, Asian | 4, Native Hawaiian, other Pacific Islander, American Indian or Alaska Native | 5, Other |7, Mixed race, | 99, Prefer not to say | Categorical |
| **Marital Status** | 0, Single | 1, Married, Member of unmarried couple | 2, Divorced, Widowed, Separated, Never married | 99, Prefer not to say | Categorical |
| **Education level** What is the highest grade or year of school you have completed? | 0, below college graduate | 1, College Graduate | 99, prefer not to say | Categorical |
| **Income** Please select your income range | 1, Less than $25,000 | 2, $25,000 to less than $50,000 | 3, $50,000 to less than $75,000 | 4, $75,000 or more | 99, Prefer not to say | Categorical |
| **Political status** What is your political affiliation? | 1, Liberal | 2, Moderate | 3, Prefer not to say | 4, Conservative | Categorical |
| **Intention** How likely is it that you will get a COVID-19 vaccine (again) in the future? | 1, Extremely unlikely | 2, Unlikely | 3, Neither likely nor unlikely | 4, Likely | 5, Extremely likely | Categorical |
